# Supplementary material
Source: Springer Nature journal article supplement (https://www.springermedizin.de/resource/supplementary/12879_2009_1315_MOESM1_ESM.PDF/9442328)
Supplement: MOESM1 [file 9442328]

**Table 1. Summary of previously reported *Mycoplasma hominis* pneumonia in immunocompetent patients**

| Patient no. | Age (years) | Isolated Pathogens                          | Site of isolation                 | Reason for Hospital admission                    | Risk factor, prior illness | Initial Empirical treatment                         | Adjusted therapy | Outcome  | Reference |
|-------------|-------------|---------------------------------------------|-----------------------------------|--------------------------------------------------|----------------------------|-----------------------------------------------------|------------------|----------|-----------|
| 1           | 24          | <i>M. hominis</i>                           | Blood, Ankle Wound, Pleural Fluid | Complicated pneumonia                            | Polytrauma                 | Erythromycin                                        | -                | Resolved | [17]      |
| 2           | 21          | <i>M. hominis</i> and <i>Klebsiella spp</i> | Pleural Fluid                     | Complicated pneumonia                            | No risk factors known      | Cefazolin, cefoxitin, penicillin and erythromycin   | -                | Resolved | [15]      |
| 3           | 32          | <i>M. hominis</i>                           | Pleural Fluid                     | Complicated pneumonia                            | Pregnancy                  | Netilmycin, ceftriaxone and erythromycin            | Doxycycline      | Resolved | [13]      |
| 4           | 35          | <i>M. hominis</i>                           | Blood                             | Pneumonia                                        | No risk factors known      | Cefotaxime, penicillin, erythromycin and gentamicin | -                | Died     | [16]      |
| 5           | 19          | <i>M. hominis</i>                           | Tracheal aspirate                 | Pneumonia                                        | Head trauma                | Rolitetraacycline                                   | -                | Resolved | [16]      |
| 6           | 39          | <i>M. hominis</i>                           | Tracheal aspirate                 | Pneumonia                                        | Subdural hematoma          | Ceftriaxone and erythromycin                        | -                | Died     | [16]      |
| 7           | 24          | <i>M. hominis</i>                           | Lung autopsy                      | Pneumonia                                        | No risk factors known      | Ceftriaxone, erythromycin and gentamicin            | -                | Died     | [16]      |
| 8           | 25          | <i>M. hominis</i>                           | BAL                               | Multiple fractures                               | No risk factors known      | Piperacillin/tazobactam                             | Ciprofloxacin    | Resolved | [14]      |
| 9           | 46          | <i>M. hominis</i>                           | BAL                               | Hypertension alcoholism                          | Subarachnoid hemorrhage    | Piperacillin/tazobactam                             | Levofloxacin     | Resolved | [14]      |
| 10          | 42          | <i>M. hominis</i> and <i>P.aeruginosa</i>   | BAL                               | Esophageal carcinoma tracheoeso- phageal fistula | Septic shock               | Imipenem                                            | -                | Died     | [14]      |
| 11          | 36          | <i>M. hominis</i>                           | BAL                               | Hepatitis C                                      | Polytrauma                 | Cefepime and levofloxacin                           | Levofloxacin     | Resolved | [14]      |

BAL: Bronchoalveolar lavage
